# Supplementary material
Source: ML conference proceedings conference paper supplement (https://openaccess.thecvf.com/content/CVPR2026/html/Hu_Omni-Attack_Adversarial_Attacks_CVPR_2026_paper.html)
Supplement: Supplementary file 1 [file Hu_Omni-Attack_Adversarial_Attacks_CVPR_2026_supplemental.pdf]

# Omni-Attack: Adversarial Attacks on Open-Ended VQA in Black-Box Multimodal LLMs

## Supplementary Material

### A. Prompt Template Used in This Paper

Prompt template used to generate a wrong answer for the OCR split:

```
You are given a text recognition (OCR) question about an image. Your task is to generate a plausible but incorrect answer.
```

```
Question:
{{question}}
```

```
Correct Answer:
{{ground_truth}}
```

```
Output Format:
Only the incorrect answer. No explanations or additional text.
```

Prompt template used to judge if the answer to an OCR question is correct or not:

```
Your task is to determine if the OCR output correctly matches the reference text.
```

```
Input:
- Reference Text: {{reference_text}}
- OCR Output: {{ocr_output}}
```

```
Evaluation Criteria:
- The OCR output must accurately match the meaning of the reference text
- Ignore differences in leading/trailing whitespace
- Ignore minor formatting differences unless they affect meaning
```

```
Output Format:
Return only one of the following:
- **CORRECT** if the OCR output matches the reference text
- **INCORRECT** if there are any discrepancies
Your response must be exactly one word: either CORRECT or INCORRECT.
```

---

### Algorithm 1 Data Augmentation Pipeline

---

- 1: **Input:** Original image  $x_{\text{image}} \in [0, 1]^{H \times W \times 3}$ , the perturbation to be optimized  $\delta \in [-\epsilon, \epsilon]^{H \times W \times 3}$  where  $\epsilon >$  is the perturbation norm bound, and input size of the surrogate model  $D$ .
  - 2:  $x \leftarrow x_{\text{image}} + \delta$
  - 3: **if** Uniform[0, 1] < 0.5 **then**
  - 4:  $h_1, h, w_1, w \leftarrow \text{RandomResizedCrop}(H, W)$
  - 5:  $x \leftarrow x[h_1 : h_1 + h, w_1 : w_1 + w]$
  - 6: **if** Uniform[0, 1] < 0.5 and  $\min(h, w) < D$  **then**
  - 7:  $x \leftarrow \text{PadToMaxSize}(x, \text{max\_size} = (D, D))$
  - 8: **if** Uniform[0, 1] < 0.2 **then**
  - 9:  $x \leftarrow \text{DiffJPEG}(x, \text{quality} = \text{Uniform}[0.5, 1.0])$ .
  - 10:  $x \leftarrow \text{Resize}(x, \text{size} = (D, D))$
  - 11: **Return:** augmented image  $x$ .
- 

### B. Full Algorithms

Algorithm 1 describes the data augmentation pipeline. For model ensemble, each surrogate model takes as input different augmented views of the input image. Note that this pipeline is differentiable, i.e., the gradient on the output augmented image can be backpropagated to the input  $x_{\text{image}} + \delta$  and be used to update  $\delta$ . Algorithm 2 describes the complete algorithm for the attack optimization.

### C. Surrogate and Victim Models

In Algorithm 2, we considered surrogate models in Table 8. Our best practice is obtained by using CLIP ViT-H/14, SigLIP ViT-SO400M/14, CLIP ViT-H/14 with larger input sizes. Other models are only used in ablation studies.

Versions of the victim models are given by Table 9:

### D. Visualization of the OCR attack pipeline

Figure 2 illustrates the OCR attack pipeline. The first image on the left displays the original image along with an OCR question: “What is the date of the receipt?” The second image shows the result of text detection using PaddleOCR. In the third image, we sequentially remove each bounding box and re-ask the MLLM the OCR question to determine whether a specific bounding box is relevant to the question. Bounding boxes whose removal prevents the model from answering correctly are identified as related. In the fourth

| Model                | Input size | Hugging Face model id                     |
|----------------------|------------|-------------------------------------------|
| CLIP ViT-H/14        | 378        | apple/DFN5B-CLIP-ViT-H-14-378             |
| CLIP ViT-H/14        | 224        | apple/DFN5B-CLIP-ViT-H-14                 |
| SigLIP ViT-SO400M/14 | 384        | timm/ViT-SO400M-14-SigLIP-384             |
| SigLIP ViT-SO400M/14 | 224        | timm/ViT-SO400M-14-SigLIP                 |
| CLIP ViT-H/14        | 336        | UCSC-VLAA/ViT-H-14-CLIPA-336-datacomp1B   |
| CLIP ViT-H/14        | 224        | cs-giung/clip-vit-huge-patch14-fullcc2.5b |
| DINO-V2 ViT-L        | 336        | facebook/dinov2-large                     |

Table 8. Details of surrogate Models

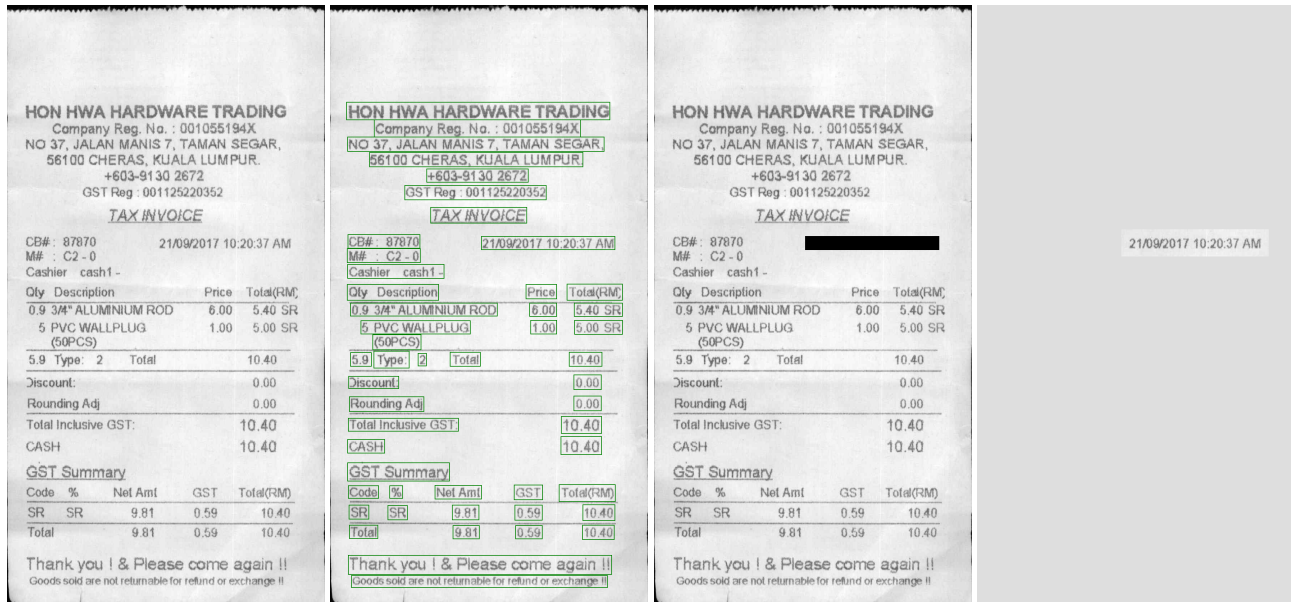

Figure 2. Visualization of the OCR Attack Pipeline. From left to right: the original test image, text detection results, image without one bounding box, final image used in the optimization

| Model             | Hugging Face model id or API version |
|-------------------|--------------------------------------|
| Qwen3-VL 30B      | Qwen/Qwen3-VL-30B-A3B-Instruct       |
| GPT-4o            | gpt-4o-2024-08-06                    |
| GPT-4.1           | gpt-4.1-2025-04-14                   |
| Claude 3.5 Sonnet | claude-3-5-sonnet-20240620           |
| Claude 3.7 Sonnet | claude-3-7-sonnet-20250219           |
| Gemini 2.0        | gemini-2.0-flash                     |

Table 9. Victim Models

image, we mask all areas outside the relevant bounding box(es), allowing only the pixels within these bounding box(es) to be optimized.

We provide an additional ablation study about the OCR attack pipeline. In our best practice (named as P0), we expand this box to  $[x_m - R, y_m - R, x_m + R, y_m + R]$ ,

where

$$R = \min(x_M - x_m, y_M - y_m)/2$$

and perform the target optimization only within this region. Pixels outside this region are masked and not optimized. We consider alternative practices:

- P1)  $R = 0$ : only optimize the exact bounding box region.
- P2)  $R = \min(x_M - x_m, y_M - y_m) \times 2$ : expand the bounding box to a larger area.
- P3)  $R = \infty$ : use the entire image to optimize.
- P4)  $R = \min(x_M - x_m, y_M - y_m)/2$ , the same as our best practice, but the selected bounding box(es) are manually verified and adjusted.

Table 10 presents the results of the ablation experiments. The last Practice, P4, shows how bounding box selection performance influences the attack performance. The comparison between P0 and P1~3 shows that optimizing on a properly selected region is necessary. If the region is too

---

**Algorithm 2** Transfer-based Attack Optimization
 

---

- 1: **Input:** Original image  $x_{\text{image}} \in [0, 1]^{H \times W \times 3}$ , perturbation norm bound  $\epsilon$ , and surrogate models  $\{F_i\}_{i=1}^N$  with the corresponding loss function  $\{\ell_i\}_{i=1}^N$ . Optimization step  $T = 1000$ .
  - 2:  $\delta \leftarrow \mathbf{0}^{H \times W \times 3}$
  - 3:  $\delta^{\text{EMA}} \leftarrow \mathbf{0}^{H \times W \times 3}$
  - 4: Initialize an Adam optimizer with  $\eta = 10/255$  and zero weight decay.
  - 5: **for**  $t = 1, \dots, T$  **do**
  - 6:    $\nabla \delta \leftarrow \mathbf{0}^{H \times W \times 3}$
  - 7:   **for**  $i = 1, \dots, N$  **do**
  - 8:     Generate an augmented image  $\tilde{x}_i$  using Algorithm 1.
  - 9:     Generate a new model variant  $\tilde{F}_i$  from  $F_i$  using DropPath and PatchDrop.
  - 10:     Compute the loss  $\ell_i(\tilde{F}_i(\tilde{x}_i))$ .
  - 11:     Compute the gradient of  $\delta$  with respect to the loss  $\frac{\partial}{\partial \delta} \ell_i(\tilde{F}_i(\tilde{x}_i))$ .
  - 12:      $\nabla \delta \leftarrow \nabla \delta + \frac{\partial}{\partial \delta} \ell_i(\tilde{F}_i(\tilde{x}_i))$
  - 13:      $\delta \leftarrow \text{Adam}(\nabla \delta) \triangleright$  Use Adam Optimizer to update  $\delta$  with the accumulated gradient
  - 14:      $\delta \leftarrow \text{Clip}(\delta, -\epsilon, +\epsilon)$
  - 15:      $\delta \leftarrow \text{Clip}(x + \delta, 0, 1) - x \triangleright$  Make sure  $x + \delta \in [0, 1]$
  - 16:      $\delta^{\text{EMA}} \leftarrow \delta^{\text{EMA}} \cdot 0.99 + \delta \cdot 0.01$ .
  - 17: **Return:** generated perturbation  $\delta^{\text{EMA}}$ .
- 

small, the optimization space might not be large enough. However if the region is too large, the optimization has a risk to generate an adversarial perturbation for other information on the image.

| Practice | GPT-4o | Claude3.5 |
|----------|--------|-----------|
| P0       | 38.5   | 19.5      |
| P1       | 38.3   | 19.0      |
| P2       | 36.5   | 17.8      |
| P3       | 1.5    | 0         |
| P4       | 41.0   | 20.3      |

Table 10. Ablation study on the OCR attack pipeline. Results are reported on the OCRBench-v2 Split at  $\epsilon = 16/255$ .

## E. Evaluation for NIPS 2017 dataset

For the NIPS 2017 dataset, we use a stricter evaluation criteria than prior work. Specifically, we use the following template to prompt the victim MLLM to generate a caption for the image:

Provide a detailed description of the

image using no more than five sentences.

Next we use the GPT-4.1 judge to evaluate if the caption corresponds to the ground truth category, the target category, neither or both. We use the following template to prompt GPT-4.1 An attack is considered successful only if GPT-4.1 responses with “B”.

The paragraph is a description of an image:  
 {{caption}}

Which of the following best describes the category of the object in the image:  
 A) {{ground truth category}}.  
 B) {{targeted category}}.  
 C) both A and B.  
 D) neither A or B.  
 Answer with "A)", "B)", "C)", or "D)".

Under our evaluation framework, an adversarial image is deemed a failed attack if it elicits perception of both the original category and the target category. Consequently, when we reproduce prior work using this stricter criteria, our reproduced performance is substantially lower than those originally reported, as previous evaluations permitted dual-category perception as a success condition. For example, the following caption for image in Figure 3 is considered a failed attack to attack an image of the **brass, memorial tablet, plaque** category into a **freight car** category.

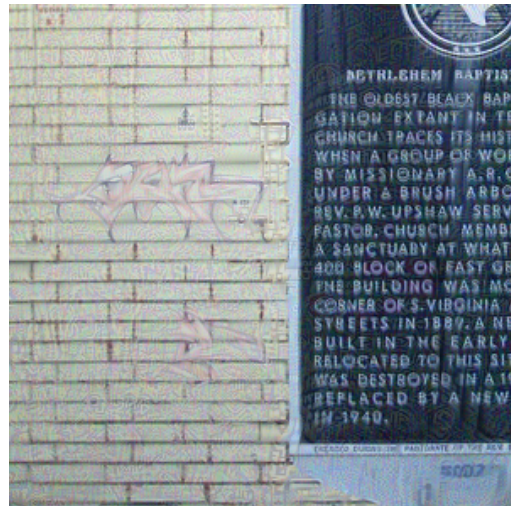

Figure 3. Our evaluation considers it a failed attack, but previous work regarded it as a successful example for the italics caption.

*The image shows a section of a freight train car with a beige, corrugated metal surface. There is graffiti art featuring stylized text and shapes in*

shades of pink and red. Adjacent to the graffiti, a black and white informational panel is visible, containing text about a church and its history. The panel includes details such as names, dates, and events related to the church's establishment and relocation. The overall scene combines urban art with historical information.

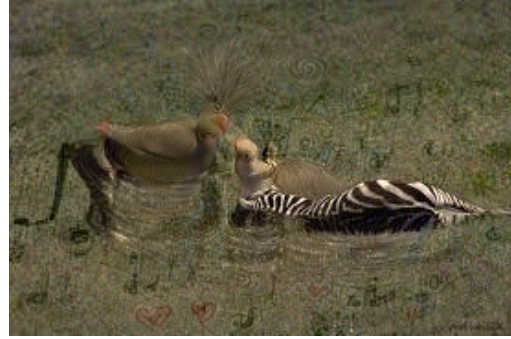

Figure 5. Relation Reasoning Example

## F. Additional Visual Examples

In this section, we provide additional visual examples that our method can manipulate MLLMs' responses. All adversarial examples are conducted under  $\epsilon = 16/255$  and in a targeted way. The victim models are GPT-4.1 or Claude 3.7.

Figure 4 Question: Which term matches the picture?  
 Option A: monocot.  
 Option B: dicot.  
 Option C: neither A or B.  
 Correct answer: Option A. Model answer: Option B.

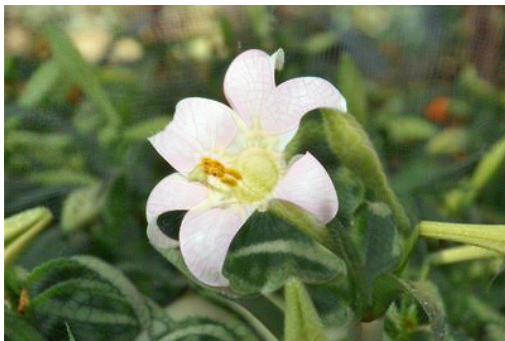

Figure 4. Attribute Recognition Example

Figure 5 Question: What is the nature relation of these animals  
 Option A: predation.  
 Option B: mutualism.  
 Option C: parasitism.  
 Option D: neither A, B or C.  
 Correct answer: Option A. Model answer: Option B.

Figure 6 Question: Based on the image, what is the primary focus of the scene?  
 Option A: The adult and child are standing on a snowy surface, with the child wearing skis, indicating they are learning how to ski.  
 Option B: The adult and child are enjoying a walk in a snowy area.  
 Option C: The adult and child are participating in a snowball fight.  
 Option D: The adult and child are hiking in a mountainous region.  
 Correct answer: Option A. Model answer: Option B.

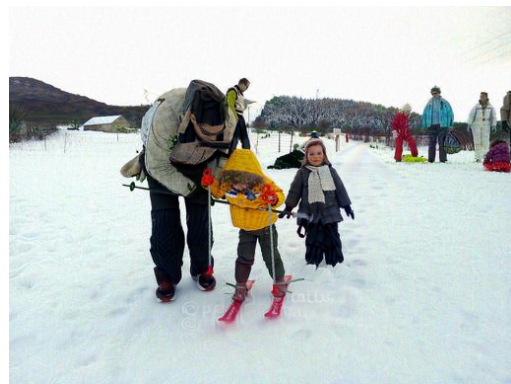

Figure 6. Image topic Example

Figure 7 Question: Which emotion is being depicted in this image  
 Option A: happiness.  
 Option B: sadness.  
 Option C: anger.  
 Option D: love  
 Correct answer: Option B. Model answer: Option A.

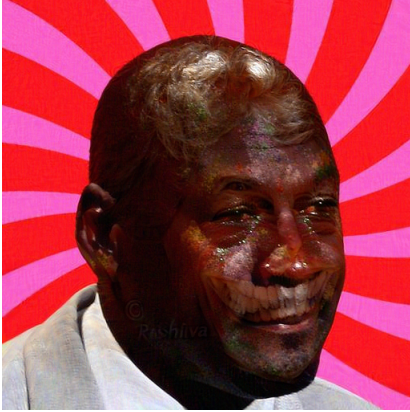

Figure 7. Image Emotion Example

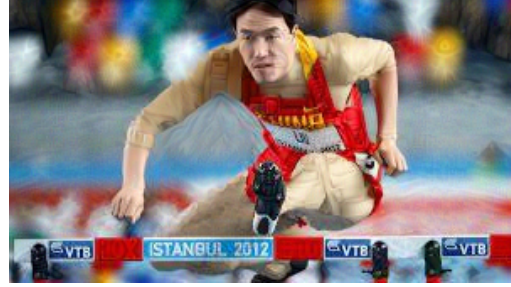

Figure 9. Object Localization Example

Figure 10 Question: Extract text from the image

Option A: EDUCATION HALL

Option B: UNIVERSITY HAL

Option C: SCHOOL HALL

Option D: ACADEMIC HALL

Correct answer: Option B. Model answer: Option D.

Figure 8 Question: How many giraffes are in this photo

Option A: zero

Option B: one.

Option C: two.

Option D: four.

Correct answer: Option B. Model answer: Option C.

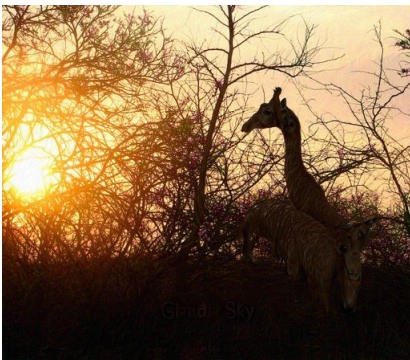

Figure 8. Object Localization Example

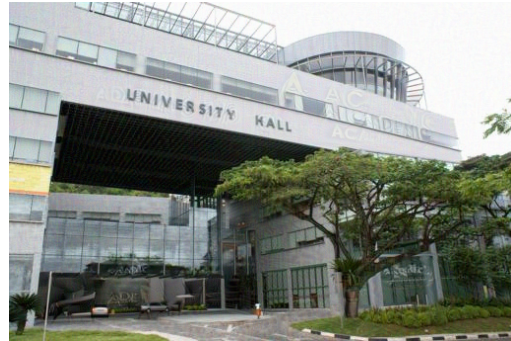

Figure 10. OCR Example

Figure 9 Question: Who is the person in this image

Option A: Bear Grylls

Option B: Lionel Messi.

Option C: Xiang Liu.

Option D: Kobe Bryant.

Correct answer: Option C. Model answer: Option A.
